# Supplementary material
Source: Springer Nature journal article supplement (https://www.springermedizin.de/resource/supplementary/12936_2010_1754_MOESM1_ESM.pdf/9541670)

**Key**  
CQ: Chloroquine  
SP: Sulfadoxine-Pyrimethamine  
ACPR: Adequate clinical and parasitological response

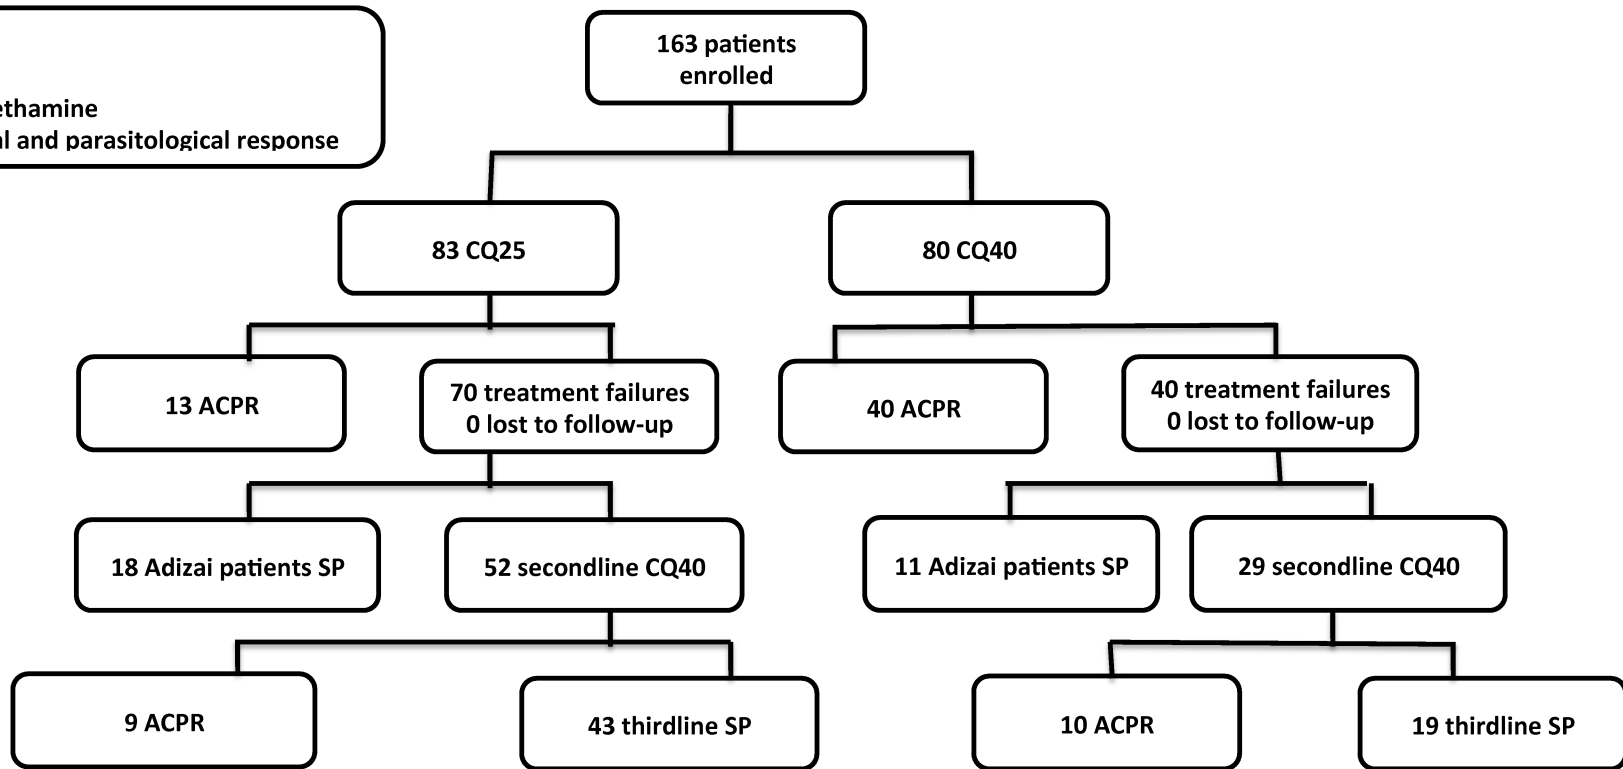

Supplement: MOESM1 [file 9541670]
